# Supplementary material for: Trichoderma-Based Biopreparation with Prebiotics Supplementation for the Naturalization of Raspberry Plant Rhizosphere
Source: MDPI journal article supplement (doi:10.3390/ijms22126356), 2021-06-14
Supplement: s1 [file s1]

**Table S2.** The data set of culture media composition and the conditions used in screening for *Trichoderma* isolates sporulation. Abbreviations: Potato Dextrose Agar (PDA), Malt Extract Lab Agar (MEA), Corn Meal with glycerol (CM), modified Mandels and Andreotti with agar (MA), soy flour, cellulose, lactose agar medium (MSCL-A), yeast and malt extract minimal agar medium (TR), minimal agar medium with cellulose (MN), wheat bran and apple pomace agar medium with supplements (WBAP-A), wheat bran and apple pomace agar medium with CaCl<sub>2</sub> and KH<sub>2</sub>PO<sub>4</sub> (WBAP-B), wheat bran and apple pomace agar medium with microcrystalline cellulose and soy flour (WBAP-C), wheat bran and apple pomace agar medium with microcrystalline cellulose, soy flour, CaCl<sub>2</sub> and KH<sub>2</sub>PO<sub>4</sub> (WBAP-D), wheat bran and apple pomace medium (WBAP-E), wheat bran and apple pomace medium with grounded straw and microcrystalline cellulose (WBAP-F), wheat bran, and apple pomace medium with microcrystalline cellulose (WBAP-G), wheat bran and apple pomace medium with pine sawdust (WBAP-H), liquid medium based on soy flour, cellulose, lactose (MSCL-L).

| Agar medium                                     |                 |                                 |                 |                                                 |                 |                                                 |                 |
|-------------------------------------------------|-----------------|---------------------------------|-----------------|-------------------------------------------------|-----------------|-------------------------------------------------|-----------------|
| MSCL-A                                          |                 | TR                              |                 | MN                                              |                 | MA                                              |                 |
| Lactose                                         | 17.5 g/l        | Glucose                         | 10 g/l          | (NH <sub>4</sub> ) <sub>2</sub> SO <sub>4</sub> | 3 g/l           | (NH <sub>4</sub> ) <sub>2</sub> SO <sub>4</sub> | 1.4 g/l         |
| Microcrystalline cellulose                      | 11.8 g/l        | KH <sub>2</sub> PO <sub>4</sub> | 11 g/l          | KH <sub>2</sub> PO <sub>4</sub>                 | 1 g/l           | KH <sub>2</sub> PO <sub>4</sub>                 | 2.0 g/l         |
| Soy flour                                       | 17.5 g/l        | Yeast extract                   | 5 g/l           | MgSO <sub>4</sub> x 7H <sub>2</sub> O           | 5 g/l           | MgSO <sub>4</sub> x 7H <sub>2</sub> O           | 0.3 g/l         |
| KH <sub>2</sub> PO <sub>4</sub>                 | 6.3 g/l         | Malt extract                    | 30 g/l          | Yeast extract                                   | 5 g/l           | CaCl <sub>2</sub> x 2H <sub>2</sub> O           | 0.3 g/l         |
| (NH <sub>4</sub> ) <sub>2</sub> SO <sub>4</sub> | 9.92 g/l        | Agar                            | 20 g/l          | Microcrystalline cellulose                      | 20 g/l          | Urea                                            | 0.3 g/l         |
| CaCl <sub>2</sub>                               | 1.64 g/l        | pH                              | 5               | Agar                                            | 20 g/l          | Casein peptone                                  | 1.0 g/l         |
| MgSO <sub>4</sub> x 7H <sub>2</sub> O           | 0.82 g/l        | Spores inoculum                 | 10 <sup>2</sup> | pH                                              | 5               | Glucose                                         | 10 g/l          |
| Tween 80                                        | 0.15%           | Temperature                     | 26°C            | Spores inoculum                                 | 10 <sup>2</sup> | Micronutrient solution                          | 20 ml/l         |
| Antifoam B                                      | 5 ml/l          |                                 |                 | Temperature                                     | 26°C            | FeSO <sub>4</sub> x 7H <sub>2</sub> O           | 250 mg/l        |
| Micronutrient solution                          | 20 ml/l         |                                 |                 |                                                 |                 | MnSO <sub>4</sub> x H <sub>2</sub> O            | 80 mg/l         |
| FeSO <sub>4</sub> x 7H <sub>2</sub> O           | 513 mg/l        |                                 |                 |                                                 |                 | ZnSO <sub>4</sub> x 7H <sub>2</sub> O           | 70 mg/l         |
| MnSO <sub>4</sub> x H <sub>2</sub> O            | 166 mg/l        |                                 |                 |                                                 |                 | Agar                                            | 20 g/l          |
| ZnSO <sub>4</sub> x 7H <sub>2</sub> O           | 8.5 mg/l        |                                 |                 |                                                 |                 | pH                                              | 5               |
| CoCl <sub>2</sub> x 6H <sub>2</sub> O           | 204 mg/l        |                                 |                 |                                                 |                 | Spores inoculum                                 | 10 <sup>2</sup> |
| Agar                                            | 35 g/l          |                                 |                 |                                                 |                 | Temperature                                     | 26°C            |
| pH                                              | 5               |                                 |                 |                                                 |                 |                                                 |                 |
| Spores inoculum                                 | 10 <sup>2</sup> |                                 |                 |                                                 |                 |                                                 |                 |
| Temperature                                     | 26°C            |                                 |                 |                                                 |                 |                                                 |                 |
| WBAP-A                                          |                 | WBAP-B                          |                 | WBAP-C                                          |                 | WBAP-D                                          |                 |
| Wheat bran Durum                                | 7 g/l           | Wheat bran Durum                | 7 g/l           | Wheat bran Durum                                | 7 g/l           | Wheat bran Durum                                | 7 g/l           |
| Dried apple pomace                              | 14 g/l          | Dried apple pomace              | 14 g/l          | Dried apple pomace                              | 14 g/l          | Dried apple pomace                              | 14 g/l          |
| Whey protein concentrate                        | 5 g/l           | Whey protein concentrate        | 5 g/l           | Whey protein concentrate                        | 5 g/l           | Whey protein concentrate                        | 5 g/l           |
| Saccharose                                      | 1 g/l           | Saccharose                      | 1 g/l           | Saccharose                                      | 1 g/l           | Saccharose                                      | 1 g/l           |

|                                                     |                 |                                                     |                 |                                                     |                 |                                                     |                 |
|-----------------------------------------------------|-----------------|-----------------------------------------------------|-----------------|-----------------------------------------------------|-----------------|-----------------------------------------------------|-----------------|
| Glucose                                             | 1 g/l           |
| (NH <sub>4</sub> ) <sub>2</sub> HPO <sub>4</sub> 1% | 15 ml/l         | (NH <sub>4</sub> ) <sub>2</sub> HPO <sub>4</sub> 1% | 15 ml/l         | (NH <sub>4</sub> ) <sub>2</sub> HPO <sub>4</sub> 1% | 15 ml/l         | (NH <sub>4</sub> ) <sub>2</sub> HPO <sub>4</sub> 1% | 15 ml/l         |
| Micronutrient solution                              | 10 ml/l         | CaCl <sub>2</sub>                                   | 1.6 g/l         | Microcrystalline cellulose                          | 11.67 g/l       | CaCl <sub>2</sub>                                   | 1.6 g/l         |
| FeSO <sub>4</sub> x 7H <sub>2</sub> O               | 250 mg/l        | KH <sub>2</sub> PO <sub>4</sub>                     | 6.3 g/l         | Soy flour                                           | 17.5 g/l        | KH <sub>2</sub> PO <sub>4</sub>                     | 6.3 g/l         |
| MnSO <sub>4</sub> x H <sub>2</sub> O                | 80 mg/l         | Micronutrient solution                              | 10 ml/l         | Micronutrient solution                              | 10 ml/l         | Soy flour                                           | 17.5 g/l        |
| ZnSO <sub>4</sub> x 7H <sub>2</sub> O               | 70 mg/l         | FeSO <sub>4</sub> x 7H <sub>2</sub> O               | 250 mg/l        | FeSO <sub>4</sub> x 7H <sub>2</sub> O               | 250 mg/l        | Microcrystalline cellulose                          | 11.67 g/l       |
| Adenosine                                           | 1.6 g/l         | MnSO <sub>4</sub> x H <sub>2</sub> O                | 80 mg/l         | MnSO <sub>4</sub> x H <sub>2</sub> O                | 80 mg/l         | Micronutrient solution                              | 10 ml/l         |
| Adonitol                                            | 1.6 g/l         | ZnSO <sub>4</sub> x 7H <sub>2</sub> O               | 70 mg/l         | ZnSO <sub>4</sub> x 7H <sub>2</sub> O               | 70 mg/l         | FeSO <sub>4</sub> x 7H <sub>2</sub> O               | 250 mg/l        |
| Arabitol                                            | 1.6 g/l         | Agar                                                | 35 g/l          | Agar                                                | 35 g/l          | MnSO <sub>4</sub> x H <sub>2</sub> O                | 80 mg/l         |
| Erythritol                                          | 1.6 g/l         | pH                                                  | 5               | pH                                                  | 5               | ZnSO <sub>4</sub> x 7H <sub>2</sub> O               | 70 mg/l         |
| Mannitol                                            | 1.6 g/l         | Spores inoculum                                     | 10 <sup>2</sup> | Spores inoculum                                     | 10 <sup>2</sup> | Agar                                                | 35 g/l          |
| Sorbitol                                            | 1.6 g/l         | Temperature                                         | 26°C            | Temperature                                         | 26°C            | pH                                                  | 5               |
| Agar                                                | 35 g/l          |                                                     |                 |                                                     |                 | Spores inoculum                                     | 10 <sup>2</sup> |
| pH                                                  | 5               |                                                     |                 |                                                     |                 | Temperature                                         | 26°C            |
| Spores inoculum                                     | 10 <sup>2</sup> |                                                     |                 |                                                     |                 |                                                     |                 |
| Temperature                                         | 26°C            |                                                     |                 |                                                     |                 |                                                     |                 |

#### SOLID-STATE MEDIUM

| WBAP-E                                           |               | WBAP-F                                           |          | WBAP-G                                           |                 | WBAP-H                                           |                 |
|--------------------------------------------------|---------------|--------------------------------------------------|----------|--------------------------------------------------|-----------------|--------------------------------------------------|-----------------|
| Plastic transparent bag                          | 50 cm x 70 cm | Conical flask                                    | 500 ml   | Conical flask                                    | 250 ml          | Conical flask                                    | 250 ml          |
| Wheat bran Durum                                 | 70 g          | Wheat bran Durum                                 | 3.5 g    | Wheat bran Durum                                 | 1.75 g          | Wheat bran Durum                                 | 1.75 g          |
| Dried apple pomace                               | 14 g          | Dried apple pomace                               | 7 g      | Dried apple pomace                               | 3.5 g           | Dried apple pomace                               | 3.5 g           |
| Whey protein concentrate                         | 50 g          | Whey protein concentrate                         | 2.5 g    | Whey protein concentrate                         | 1.25 g          | Whey protein concentrate                         | 1.25 g          |
| Micronutrient solution                           | 100 ml        | Grounded straw                                   | 1 g      | Microcrystalline cellulose                       | 0.41g           | Pine sawdust                                     | 0.5 g           |
| FeSO <sub>4</sub> x 7H <sub>2</sub> O            | 250 mg/l      | Microcrystalline cellulose                       | 0.275 g  | Micronutrient solution                           | 2.5 ml/l        | Micronutrient solution                           | 2.5 ml/l        |
| MnSO <sub>4</sub> x H <sub>2</sub> O             | 80 mg/l       | Micronutrient solution                           | 5 ml/l   | FeSO <sub>4</sub> x 7H <sub>2</sub> O            | 250 mg/l        | FeSO <sub>4</sub> x 7H <sub>2</sub> O            | 250 mg/l        |
| ZnSO <sub>4</sub> x 7H <sub>2</sub> O            | 70 mg/l       | FeSO <sub>4</sub> x 7H <sub>2</sub> O            | 250 mg/l | MnSO <sub>4</sub> x H <sub>2</sub> O             | 80 mg/l         | MnSO <sub>4</sub> x H <sub>2</sub> O             | 80 mg/l         |
| (NH <sub>4</sub> ) <sub>2</sub> HPO <sub>4</sub> | 1.5 g         | MnSO <sub>4</sub> x H <sub>2</sub> O             | 80 mg/l  | ZnSO <sub>4</sub> x 7H <sub>2</sub> O            | 70 mg/l         | ZnSO <sub>4</sub> x 7H <sub>2</sub> O            | 70 mg/l         |
| Saccharose                                       | 10 g          | ZnSO <sub>4</sub> x 7H <sub>2</sub> O            | 70 mg/l  | (NH <sub>4</sub> ) <sub>2</sub> HPO <sub>4</sub> | 3.75 g          | (NH <sub>4</sub> ) <sub>2</sub> HPO <sub>4</sub> | 3.75 g          |
| Glucose                                          | 10 g          | (NH <sub>4</sub> ) <sub>2</sub> HPO <sub>4</sub> | 7.5 g    | Saccharose                                       | 0.25 g          | Saccharose                                       | 0.25 g          |
| Spores inoculum 70%T                             | 50 ml         | Saccharose                                       | 0.5 g    | Glucose                                          | 0.25 g          | Glucose                                          | 0.25 g          |
| Temperature                                      | 22-26°C       | Glucose                                          | 0.5 g    | Spores inoculum                                  | 10 <sup>3</sup> | Spores inoculum                                  | 10 <sup>3</sup> |

|                                                 |                 |                 |                 |                 |                 |                 |                 |
|-------------------------------------------------|-----------------|-----------------|-----------------|-----------------|-----------------|-----------------|-----------------|
|                                                 |                 | Spores inoculum | 10 <sup>3</sup> | Temperature     | 26°C            | Temperature     | 26°C            |
|                                                 |                 | Temperature     | 26°C            |                 |                 |                 |                 |
| LIQUID & COMMERCIAL AGAR MEDIUM                 |                 |                 |                 |                 |                 |                 |                 |
| MSCL-L                                          |                 | PDA             |                 | CM              |                 | MEA             |                 |
| Conical flask / Medium volume                   | 100 ml / 50 ml  |                 |                 |                 |                 |                 |                 |
| Lactose                                         | 17.5 g/l        |                 |                 |                 |                 |                 |                 |
| Microcrystalline cellulose                      | 11.8 g/l        | Oxoid®          | 39 g/l          | Biomaxima®      | 17 g/l          | Biocorp®        | 33 g/l          |
| Soy flour                                       | 17.5 g/l        | Spores inoculum | 10 <sup>2</sup> | Spores inoculum | 10 <sup>2</sup> | Spores inoculum | 10 <sup>2</sup> |
| KH <sub>2</sub> PO <sub>4</sub>                 | 6.3 g/l         | Temperature     | 26°C            | Temperature     | 26°C            | Temperature     | 26°C            |
| (NH <sub>4</sub> ) <sub>2</sub> SO <sub>4</sub> | 9.92 g/l        |                 |                 |                 |                 |                 |                 |
| CaCl <sub>2</sub>                               | 1.64 g/l        |                 |                 |                 |                 |                 |                 |
| MgSO <sub>4</sub> x 7H <sub>2</sub> O           | 0.82 g/l        |                 |                 |                 |                 |                 |                 |
| Tween 80                                        | 0.15%           |                 |                 |                 |                 |                 |                 |
| Antifoam B                                      | 5 ml/l          |                 |                 |                 |                 |                 |                 |
| Micronutrient solution                          | 20 ml/l         |                 |                 |                 |                 |                 |                 |
| FeSO <sub>4</sub> x 7H <sub>2</sub> O           | 513 mg/l        |                 |                 |                 |                 |                 |                 |
| MnSO <sub>4</sub> x H <sub>2</sub> O            | 166 mg/l        |                 |                 |                 |                 |                 |                 |
| ZnSO <sub>4</sub> x 7H <sub>2</sub> O           | 8.5 mg/l        |                 |                 |                 |                 |                 |                 |
| CoCl <sub>2</sub> x 6H <sub>2</sub> O           | 204 mg/l        |                 |                 |                 |                 |                 |                 |
| pH                                              | 5               |                 |                 |                 |                 |                 |                 |
| rpm                                             | 150             |                 |                 |                 |                 |                 |                 |
| Spores inoculum                                 | 10 <sup>3</sup> |                 |                 |                 |                 |                 |                 |
| Temperature                                     | 26°C            |                 |                 |                 |                 |                 |                 |
