# Supplementary material for: Trichoderma-Based Biopreparation with Prebiotics Supplementation for the Naturalization of Raspberry Plant Rhizosphere
Source: MDPI journal article supplement (doi:10.3390/ijms22126356), 2021-06-14
Supplement: s1 [file s1]

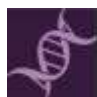

**Table S1.** The antagonistic properties of wild raspberry fungal isolates against phytopathogens *Colletotrichum* spp. (including *C. acutatum*), *Verticillium* spp., *Phytophthora* spp., and *Botrytis* spp. (including *B. cinerea*), resulting in growth and/or sporulation inhibition in an experiment on Petri dishes. Abbreviations: the antagonism abilities rating was used: “+++”, “++”, “+”, “-” meaning excellent, very good, good, and no response, respectively.

| Isolate | <i>Colletotrichum</i> spp. |         |         | <i>Verticillium</i> spp. |         |         | <i>Phytophthora</i> spp. |         |         | <i>Botrytis</i> spp. |         |         |
|---------|----------------------------|---------|---------|--------------------------|---------|---------|--------------------------|---------|---------|----------------------|---------|---------|
|         | G172/18                    | G371/18 | G166/18 | G293/18                  | G296/18 | G297/18 | G368/18                  | G373/18 | G369/18 | G275/18              | G277/18 | G276/18 |
| G27/18  | -                          | -       | -       | -                        | -       | -       | -                        | -       | -       | -                    | -       | -       |
| G28/18  | -                          | -       | -       | -                        | -       | -       | -                        | -       | -       | -                    | -       | -       |
| G29/18  | -                          | -       | -       | -                        | -       | -       | -                        | -       | -       | -                    | -       | -       |
| G40/18  | -                          | -       | -       | -                        | -       | -       | -                        | -       | -       | -                    | -       | -       |
| G43/18  | -                          | -       | -       | -                        | -       | -       | -                        | -       | -       | -                    | -       | -       |
| G48/18  | -                          | -       | +       | -                        | -       | -       | -                        | -       | -       | -                    | -       | -       |
| G56/18  | -                          | -       | -       | -                        | -       | -       | -                        | -       | -       | -                    | +       | +       |
| G57/18  | -                          | -       | -       | -                        | +       | -       | +                        | -       | +       | -                    | -       | -       |
| G58/18  | -                          | -       | -       | -                        | -       | -       | +                        | +       | -       | -                    | -       | +       |
| G59/18  | +                          | ++      | +       | +                        | +       | +       | ++                       | +       | ++      | ++                   | ++      | +++     |
| G60/18  | ++                         | ++      | ++      | ++                       | ++      | ++      | +                        | +       | ++      | ++                   | +       | ++      |
| G61/18  | ++                         | ++      | +       | ++                       | ++      | +++     | ++                       | +       | +       | +                    | ++      | ++      |
| G62/18  | +                          | ++      | ++      | +                        | ++      | +       | +                        | +       | +       | ++                   | +++     | ++      |
| G63/18  | +                          | ++      | ++      | ++                       | ++      | ++      | +                        | ++      | ++      | ++                   | ++      | ++      |
| G64/18  | +                          | ++      | +++     | ++                       | ++      | ++      | ++                       | ++      | ++      | ++                   | ++      | ++      |
| G65/18  | ++                         | +       | +       | ++                       | ++      | ++      | ++                       | +       | ++      | -                    | +       | +       |
| G66/18  | ++                         | +       | +       | ++                       | ++      | ++      | ++                       | +       | ++      | +                    | +       | +       |
| G67/18  | +                          | +       | +       | ++                       | ++      | ++      | ++                       | ++      | ++      | +                    | +       | +       |
| G68/18  | ++                         | ++      | ++      | ++                       | ++      | ++      | ++                       | +       | ++      | ++                   | ++      | +       |
| G69/18  | ++                         | +       | +       | ++                       | ++      | ++      | ++                       | +       | ++      | ++                   | ++      | ++      |
| G70/18  | +                          | +       | +       | +                        | +       | +       | +++                      | ++      | +++     | +                    | +       | +       |
| G71/18  | ++                         | ++      | ++      | ++                       | ++      | ++      | ++                       | +       | ++      | +                    | +       | +       |
| G72/18  | ++                         | ++      | ++      | +++                      | ++      | ++      | ++                       | ++      | +++     | ++                   | ++      | ++      |
| G73/18  | ++                         | ++      | ++      | ++                       | ++      | +++     | +                        | ++      | ++      | ++                   | ++      | ++      |
| G74/18  | +                          | ++      | +       | ++                       | +++     | +++     | ++                       | ++      | ++      | ++                   | ++      | ++      |
| G75/18  | +                          | +       | +       | ++                       | ++      | ++      | +                        | ++      | ++      | ++                   | ++      | ++      |
| G76/18  | ++                         | ++      | ++      | ++                       | ++      | ++      | ++                       | +       | ++      | -                    | +       | +       |
| G77/18  | +                          | +       | ++      | ++                       | ++      | +       | ++                       | +       | ++      | +                    | +       | +       |
| G78/18  | +                          | +       | +       | ++                       | ++      | ++      | ++                       | +       | ++      | -                    | +       | +       |
| G79/18  | +                          | +       | ++      | ++                       | ++      | +++     | +                        | +       | ++      | +                    | +       | +       |
| G80/18  | +                          | ++      | +       | ++                       | ++      | ++      | -                        | +       | ++      | +                    | ++      | +++     |



|         |    |    |    |    |    |    |     |     |     |     |     |     |
|---------|----|----|----|----|----|----|-----|-----|-----|-----|-----|-----|
| G86/18  | -  | -  | -  | +  | +  | +  | +   | +   | +   | -   | -   | +   |
| G87/18  | -  | -  | -  | +  | +  | +  | ++  | +   | ++  | +   | ++  | ++  |
| G90/18  | -  | -  | -  | +  | ++ | +  | +++ | ++  | ++  | ++  | +   | ++  |
| G92/18  | +  | -  | -  | +  | +  | +  | ++  | +   | ++  | +   | +   | +   |
| G97/18  | ++ | ++ | ++ | +  | ++ | ++ | -   | +   | ++  | +   | +   | ++  |
| G98/18  | -  | -  | -  | -  | -  | -  | -   | -   | -   | -   | -   | -   |
| G99/18  | -  | -  | -  | -  | -  | -  | -   | -   | -   | -   | -   | -   |
| G100/18 | -  | -  | -  | -  | -  | -  | -   | -   | -   | -   | -   | -   |
| G101/18 | -  | -  | -  | +  | -  | -  | -   | -   | -   | -   | -   | -   |
| G102/18 | -  | -  | -  | -  | -  | -  | -   | -   | -   | -   | -   | -   |
| G103/18 | -  | -  | -  | -  | +  | -  | -   | -   | -   | -   | -   | +   |
| G104/18 | -  | -  | -  | -  | -  | -  | -   | -   | -   | -   | -   | -   |
| G105/18 | -  | -  | -  | -  | -  | +  | -   | -   | -   | -   | -   | -   |
| G109/18 | +  | +  | +  | ++ | +  | +  | ++  | ++  | +++ | +   | +   | +   |
| G111/18 | -  | -  | -  | +  | +  | +  | -   | +   | -   | +   | -   | +   |
| G112/18 | -  | +  | -  | -  | -  | -  | +   | +   | +   | +   | +   | ++  |
| G113/18 | +  | +  | ++ | -  | +  | -  | +   | +   | -   | ++  | +   | +   |
| G114/18 | -  | -  | +  | -  | +  | -  | -   | +   | +   | +   | ++  | +++ |
| G118/18 | ++ | ++ | ++ | -  | +  | ++ | ++  | +++ | +   | +   | +   | +   |
| G119/18 | ++ | ++ | +  | +  | ++ | ++ | +++ | ++  | ++  | ++  | +   | +   |
| G126/18 | -  | +  | +  | -  | +  | +  | -   | +++ | -   | +++ | +++ | +++ |
| G132/18 | -  | -  | -  | -  | -  | -  | -   | -   | -   | -   | -   | -   |
| G133/18 | -  | -  | -  | -  | -  | -  | -   | -   | -   | -   | -   | -   |
| G134/18 | -  | -  | -  | -  | -  | -  | -   | -   | -   | -   | -   | -   |
| G135/18 | -  | -  | -  | -  | -  | -  | -   | -   | -   | -   | -   | -   |
| G137/18 | -  | -  | -  | -  | -  | -  | -   | -   | -   | -   | -   | -   |
| G138/18 | -  | -  | -  | -  | -  | -  | -   | -   | -   | -   | -   | -   |
| G139/18 | +  | +  | -  | -  | -  | -  | -   | +   | -   | +++ | +++ | ++  |
| G140/18 | -  | -  | -  | -  | +  | ++ | +   | ++  | +   | +   | -   | -   |
| G141/18 | -  | +  | -  | -  | -  | +  | -   | ++  | ++  | +   | +   | +   |
| G143/18 | -  | -  | -  | -  | +  | +  | -   | +++ | +++ | +   | -   | ++  |
| G149/18 | -  | -  | -  | -  | -  | -  | -   | -   | -   | -   | -   | -   |
| G150/18 | -  | -  | -  | -  | -  | -  | -   | -   | -   | -   | -   | -   |
| G152/18 | -  | -  | -  | -  | -  | -  | -   | +   | -   | -   | -   | -   |
| G153/18 | -  | -  | -  | -  | -  | -  | -   | -   | -   | -   | -   | +   |
| G155/18 | -  | -  | -  | +  | ++ | +  | +   | +   | +   | -   | -   | -   |
| G158/18 | -  | -  | -  | -  | +  | +  | -   | ++  | ++  | -   | -   | -   |
| G159/18 | -  | -  | -  | -  | +  | +  | +   | ++  | ++  | -   | -   | +   |

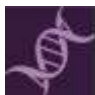

|         |    |     |    |     |    |     |     |     |     |    |    |     |
|---------|----|-----|----|-----|----|-----|-----|-----|-----|----|----|-----|
| G375/18 | +  | -   | -  | +   | +  | +   | ++  | -   | ++  | -  | +  | +   |
| G376/18 | -  | -   | -  | -   | -  | -   | -   | +   | -   | -  | +  | -   |
| G377/18 | -  | -   | -  | -   | -  | -   | -   | -   | -   | -  | -  | -   |
| G378/18 | +  | ++  | ++ | ++  | +  | ++  | ++  | ++  | ++  | +  | +  | +   |
| G379/18 | -  | +   | +  | +   | +  | ++  | -   | ++  | ++  | ++ | +  | +   |
| G380/18 | -  | -   | -  | -   | -  | -   | -   | -   | +   | -  | -  | -   |
| G381/18 | -  | -   | -  | -   | +  | -   | +   | +   | ++  | -  | -  | -   |
| G382/18 | -  | -   | -  | -   | -  | -   | -   | +   | -   | -  | -  | -   |
| G383/18 | -  | -   | -  | +   | ++ | +   | ++  | +   | +++ | ++ | +  | ++  |
| G384/18 | -  | -   | -  | +   | +  | -   | ++  | -   | ++  | -  | -  | -   |
| G385/18 | -  | -   | -  | +   | -  | +   | ++  | +++ | +++ | ++ | ++ | ++  |
| G386/18 | -  | -   | -  | +   | +  | +   | +   | +   | ++  | -  | -  | -   |
| G387/18 | +  | +++ | +  | +++ | ++ | +++ | ++  | +   | +++ | ++ | +  | +++ |
| G388/18 | ++ | ++  | ++ | +   | -  | ++  | ++  | ++  | ++  | ++ | +  | +   |
| G389/18 | +  | -   | -  | +   | +  | ++  | ++  | ++  | ++  | +  | +  | ++  |
| G390/18 | -  | -   | -  | -   | -  | -   | ++  | ++  | +++ | -  | -  | +   |
| G391/18 | -  | +   | +  | -   | -  | +   | ++  | +++ | ++  | ++ | ++ | ++  |
| G392/18 | ++ | ++  | ++ | +   | +  | +   | ++  | ++  | +   | +  | +  | +   |
| G393/18 | +  | ++  | ++ | -   | -  | ++  | ++  | ++  | ++  | +  | +  | +   |
| G394/18 | +  | -   | +  | -   | -  | +   | -   | +   | +   | +  | +  | -   |
| G395/18 | -  | -   | -  | -   | +  | +   | +   | +   | +   | -  | +  | -   |
| G396/18 | -  | -   | -  | +   | -  | -   | +++ | ++  | +++ | +  | +  | ++  |
| G397/18 | -  | -   | -  | +   | +  | +   | +   | +   | ++  | +  | -  | -   |
| G398/18 | -  | +   | +  | ++  | ++ | +++ | ++  | ++  | ++  | +  | +  | +   |
| G399/18 | -  | ++  | +  | +   | +  | ++  | ++  | +   | ++  | +  | +  | +   |
